1 **Title:** Applications of Natural Language Processing at Emergency Department Triage: A  
2 Systematic Review

3

4 **Authors:** Jonathon Stewart<sup>1, 2, 3\*</sup>, Juan Lu<sup>1, 2, 4</sup>, Adrian Goudie<sup>3</sup>, Glenn Arendts<sup>1, 3</sup>, Shiv A  
5 Meka<sup>5</sup>, Sam Freeman<sup>6, 7</sup>, Katie Walker<sup>8</sup>, Peter Sprivulis<sup>9</sup>, Frank Sanfilippo<sup>10</sup>, Mohammed  
6 Bennamoun<sup>4</sup>, Girish Dwivedi<sup>1, 2, 11</sup>

7

8 **Affiliations:**

9 <sup>1</sup> School of Medicine. The University of Western Australia, Crawley, Western Australia,  
10 Australia

11

12 <sup>2</sup> Harry Perkins Institute of Medical Research, Murdoch, Western Australia, Australia

13

14 <sup>3</sup> Department of Emergency Medicine, Fiona Stanley Hospital, Murdoch, Western Australia,  
15 Australia

16

17 <sup>4</sup> Department of Computer Science and Software Engineering, The University of Western  
18 Australia, Crawley, Western Australia, Australia

19

20 <sup>5</sup> HIVE & Data and Digital Innovation, Royal Perth Hospital, Perth, Western Australia,  
21 Australia

22

23 <sup>6</sup> Department of Emergency Medicine, St Vincent's Hospital Melbourne, Melbourne, Victoria,  
24 Australia.

25

26 <sup>7</sup> SensiLab, Monash University, Melbourne, Victoria, Australia

27

28 <sup>8</sup> School of Clinical Sciences at Monash Health, Monash University, Melbourne, Victoria,  
29 Australia

30

31 <sup>9</sup> Western Australia Department of Health, East Perth, Western Australia, Australia.

32

33 <sup>10</sup> School of Population and Global Health, University of Western Australia, Crawley,  
34 Western Australia, Australia

35

36 <sup>11</sup> Department of Cardiology, Fiona Stanley Hospital, Murdoch, Western Australia, Australia

37

38

39 \* Corresponding Author.

40 Email: [Jonathon.Stewart@research.uwa.edu.au](mailto:Jonathon.Stewart@research.uwa.edu.au) (JS)

41 **ABSTRACT**

42 **INTRODUCTION**

43 Millions of patients attend emergency departments (EDs) around the world every year.  
44 Patients are triaged on arrival by a trained nurse who collects structured data and an  
45 unstructured free-text history of presenting complaint. Natural language processing (NLP)  
46 uses various computational methods to analyse and understand human language, and has  
47 been applied to data acquired at ED triage to predict various outcomes. The objective of this  
48 systematic review is to evaluate how NLP has been applied to ED triage, assess if NLP based  
49 models outperform humans or current risk stratification techniques, and assess if  
50 incorporating free-text improve predictive performance of models when compared to  
51 predictive models that use only structured data.

52

53 **METHODS**

54 All English language peer-reviewed research that applied an NLP technique to free-text  
55 obtained at ED triage was eligible for inclusion. We excluded studies focusing solely on  
56 disease surveillance, and studies that used information obtained after triage. We searched the  
57 electronic databases MEDLINE, Embase, Cochrane Database of Systematic Reviews, Web of  
58 Science, and Scopus for medical subject headings and text keywords related to NLP and  
59 triage. Databases were last searched on 01/01/2022. Risk of bias in studies was assessed  
60 using the Prediction model Risk of Bias Assessment Tool (PROBAST). Due to the high level  
61 of heterogeneity between studies, a metaanalysis was not conducted. Instead, a narrative  
62 synthesis is provided.

63

64 **RESULTS**

65 In total, 3584 studies were screened, and 19 studies were included. The population size varied  
66 greatly between studies ranging from 1.8 million patients to 762 simulated encounters. The  
67 most common primary outcomes assessed were prediction of triage score, prediction of  
68 admission, and prediction of critical illness. NLP models achieved high accuracy in  
69 predicting need for admission, critical illness, and mapping free-text chief complaints to  
70 structured fields. Overall, NLP models predicted admission with greater accuracy than  
71 emergency physicians, outperformed abnormal vital sign trigger and triage score at predicting  
72 critical illness, and were more accurate than nurses at assigning triage scores in two out of  
73 three papers. Incorporating both structured data and free-text data improved results when  
74 compared to models that used only structured data. The majority of studies were (79%) were  
75 assessed to have a high risk of bias, and only one study reported the deployment of an NLP  
76 model into clinical practice.

77

## 78 **CONCLUSION**

79 Unstructured free-text triage notes contain valuable information that can be used by NLP  
80 models to predict clinically relevant outcomes. The use of NLP at ED triage appears feasible  
81 and could allow for early and accurate prediction of multiple important patient-oriented  
82 outcomes. However, there are few examples of implementation of into clinical practice, most  
83 research in retrospective, and the potential benefits of NLP at triage are yet to be realised.

84

85

86

87

88

89

## 90 INTRODUCTION

91 Millions of patients attend emergency departments (EDs) around the world every year.<sup>1</sup>  
92 Queues for care are common, so patients are often triaged on arrival to the ED by a trained  
93 nurse. Triage is central to the practice of emergency medicine.<sup>2</sup> In the face of excess demand,  
94 triage allows EDs to allocate their finite resources in an equitable, efficient, and standardised  
95 way.<sup>3,4</sup> Triage systems in current use include the Emergency Severity Index (ESI),  
96 Australasian Triage Scale (ATS), Manchester Triage Scale (MTS), and the Korean Triage  
97 and Acuity Scale (KTAS).<sup>3,5</sup> Triage systems aim to aid emergency care providers in making a  
98 structured decision regarding the urgency of care that a patient requires, and in doing so,  
99 identify and prioritise those patients with time-sensitive care needs.<sup>3,4</sup> However, urgency of  
100 care does not necessarily reflect severity of illness (as judged by morbidity or mortality). For  
101 example, a young patient with a known history of recurrent renal calculi who presents with  
102 severe flank pain may be appropriately triaged as high urgency to receive analgesia, but will  
103 most likely have a good clinical outcome, whereas an elderly patient with undifferentiated  
104 abdominal pain may be triaged as a lower urgency but have higher risk of morbidity and  
105 mortality. No triage tool is perfect, and all have issues with sensitivity and specificity  
106 resulting in over and under-triage, particularly for certain demographic groups and  
107 conditions.<sup>6-8</sup> There is opportunity to improve triage performance in identifying patients with  
108 critical illness, and for improving triage accuracy and the consistency of triage categorisation  
109 between healthcare workers.<sup>3</sup>

110

111 Machine learning (ML) is a subfield of artificial intelligence (AI), that uses various methods  
112 to automatically deduce patterns in data, then makes predictions.<sup>9</sup> These patterns are learned  
113 from the data rather than being explicitly pre-programmed by humans. ML models are  
114 iteratively improved through a process called training. In supervised ML training, the model's

115 predicted output is compared to a "ground truth", and the error between the predicted value  
116 and ground truth is progressively reduced through the training process.<sup>9</sup> ML models have the  
117 potential to improve risk stratification and outcome prediction in the ED setting.<sup>10-12</sup>

118

119 Triage has been identified as a promising area to apply ML in the ED.<sup>13, 14</sup> ML has previously  
120 been applied successfully to structured data acquired at triage (such as patient age and vital  
121 signs) to predict outcomes including need for admission and intensive care.<sup>15, 16</sup> Triage nurses  
122 routinely collect structured data and an unstructured free-text history of presenting complaint,  
123 capturing their impression and subjective assessment about the presentation. This free-text  
124 may be more expressive, nuanced, and contain a higher level of information than structured  
125 data.<sup>17</sup> Prior work has suggested that incorporating free-text may improve the performance of  
126 ML at ED triage and is an important area for future research despite the challenges of  
127 incorporating free-text data into models.<sup>18-20</sup>

128

129 Natural language processing (NLP) uses computational methods to analyse and understand  
130 human language and its structure.<sup>21</sup> Early NLP techniques were relatively simple. For  
131 example, a "bag-of-words" model bases its decision on the relative frequencies of words in  
132 the text, ignoring their order.<sup>22</sup> These early models often lacked the ability to assess context,  
133 negations, and as a result had numerous limitations.<sup>23</sup> Significant advancements in NLP have  
134 been made over the last few years through the use of Deep Learning (DL), a subfield of  
135 ML.<sup>24, 25</sup> DL models pass data through multiple processing layers and in doing so, achieve  
136 increasingly abstract representations of the input data, enabling them to learn complex  
137 functions.<sup>26</sup> Massive DL based NLP models have recently been developed.<sup>27-29</sup> These models  
138 have been trained on datasets containing billions of words and have achieved high levels of  
139 performance.<sup>27-29</sup> Some large, pre-trained models, such as Bidirectional Encoder

140 Representations from Transformers (BERT) are publicly available.<sup>27</sup> Using a pre-trained  
141 model allows researchers to take a high performing model as their starting point, and then  
142 customise it to their unique needs through fine tuning the model on their local data. For  
143 example, Tahayori et al. were able to accurately predict admission from ED using only free-  
144 text triage notes and a BERT based NLP model.<sup>30</sup> Multimodal models integrate NLP with  
145 other types of ML to analyse combinations of both free-text data and structured data (such as  
146 age and vital signs).

147

## 148 **Objectives**

149 This systematic review aims to evaluate the applications of NLP at ED triage by answering  
150 the following questions:

- 151 1. How has NLP been applied to ED triage?
- 152 2. Do NLP based models outperform humans or current risk stratification techniques?
- 153 3. Does incorporating free-text improve predictive performance of ML models when  
154 compared to ML models that use only structured data?

155

## 156 **METHODS**

157 A systematic review protocol was prepared in accordance with PRISMA-P guidelines and  
158 registered with the International Prospective Register of Systematic Reviews (PROSPERO)  
159 on 04/10/2021 (Registration ID: CRD42021276980).<sup>31,32</sup> All English language peer-reviewed  
160 research that applied an NLP technique to free-text obtained at ED triage were eligible for  
161 inclusion. As this study aims to broadly assess the capability of NLP at triage, all outcomes  
162 and comparators were included. We excluded studies focusing solely on disease surveillance,  
163 and studies that used information obtained after triage (such as emergency physician clinical  
164 notes and investigations performed within the ED).

165

166 We searched PubMed (MEDLINE), Embase, Cochrane Database of Systematic Reviews,  
167 Web of Science, and Scopus for research published from 01/01/2012 to present. Electronic  
168 databases were first searched on 16/09/2021 and last searched on 01/01/2022. We searched  
169 for medical subject headings (MeSH) and text keywords related to NLP and triage. The  
170 search strategy was iteratively developed by the multidisciplinary project team that included  
171 emergency physicians and computer scientists. The MEDLINE search strategy is provided in  
172 Appendix 1, and was adapted to the other databases. Reference lists of the included studies  
173 and the authors' personal archives were reviewed for further relevant literature.

174

175 Citations and abstracts were screened independently by two reviewers (JS and JL) against the  
176 inclusion and exclusion criteria. Both reviewers were blind to the journal titles, study authors,  
177 and institutions. Full text articles were obtained for any articles identified by one reviewer to  
178 meet inclusion criteria. Two reviewers (JS and JL) then evaluated the full text reports against  
179 the inclusion and exclusion criteria. Data were extracted by JS and JL using a standardised  
180 form that included study country, study design, primary outcome, number of sites, study  
181 population, input data, NLP and ML models used, comparison, and results. The form was  
182 piloted, and calibration exercises were conducted prior to formal data extraction to ensure  
183 consistency between reviewers. In cases of conflict or discrepancy, additional review authors  
184 were involved until a decision was reached. There were no uncertainties that required authors  
185 of the included studies to be contacted.

186

187 Data extracted included the study country, study type, outcomes, population, input data, NLP  
188 technique, ML method, comparisons, results, public availability of datasets, and public  
189 availability of model code. Risk of bias in studies was assessed independently by two authors

190 (JS and JL) using the Prediction model Risk of Bias Assessment Tool (PROBAST).<sup>33</sup> Due to  
191 the high level of heterogeneity between studies, a metanalysis was not conducted. Instead, a  
192 narrative synthesis is provided to summarise review findings.

193

## 194 **RESULTS**

### 195 **Study selection**

196 This process is summarised in a PRISMA Flow Diagram (Figure 1). There were 5099 records  
197 identified following database searching and a further 11 records identified through other  
198 sources. Following removal of duplicates, 3584 records remained and underwent title and  
199 abstract screening. 3448 records were excluded. The remaining 136 full-text articles were  
200 assessed for eligibility. In total, 117 articles were excluded, and 19 studies remained for  
201 inclusion (Figure 1). There were no unresolved disagreements as to study inclusion or results  
202 of data extraction.

203

204 [Insert Figure 1]

205

### 206 **Characteristics of included studies**

207 A summary of the included studies is shown in Table 1. There were 18 retrospective  
208 studies.<sup>17,18, 30, 34-48</sup> One study reported their ML model was developed using retrospective  
209 data then validated using prospective data.<sup>49</sup> All used observational cohort designs. Two  
210 studies were international multi-centre studies (USA and Portugal); 11 were conducted in the  
211 USA; 2 were from South Korea; one each from Australia, Brazil, China, and France. The  
212 most common primary outcomes assessed were prediction of triage score (six studies),  
213 prediction of admission (five studies), and prediction of critical illness (three studies). Two  
214 studies predicted need for imaging within the ED, two studies looked at the assignment of



215 provider assigned chief complaint label, and one study predicted diagnosis of infection in the  
216 ED.

217

218 The population size varied greatly between studies ranging from 1.8 million patients to 762  
219 simulated encounters. Four studies used a population of under 100 000, four studies had a  
220 population of between 100 000 and 200 000, six studies had a population of between 200 001  
221 and 300 000, and six studies had a population of over 300 000. Eleven studies used data from  
222 a single site and eight studies used data from multiple sites. The largest number of sites used  
223 was 642 by Zhang et al.

224

225 Fourteen studies applied NLP to free-text history of presenting complaint, seven studies  
226 applied NLP to a free-text chief complaint, two studies applied NLP to a structured chief  
227 complaint label, and one study applied NLP to simulated triage dialogues that had been  
228 transcribed by either a human or an ML model. The other most frequently used input  
229 variables were patient demographics (13 studies), patient vital signs (heart rate, respiratory  
230 rate, oxygen saturation, blood pressure, and temperature) (15 studies), pain score (12 studies),  
231 triage score (10 studies), mode of arrival (10 studies), time of arrival (8 studies) and past  
232 medical history (7 studies). Other input variables included mental status (5 studies), and  
233 blood glucose level (5 studies).

234

### 235 **Prediction of admission**

236 NLP models and multimodal models were able to accurately predict admission at time of  
237 triage for adult and paediatric patients.<sup>18, 30, 35, 41, 46</sup> Of the five studies focusing on predicting  
238 admission to hospital, Roquette et al. achieved the highest Area Under the Receiver  
239 Operating Characteristic Curve (AUC) using a gradient boosting model (AUC 0.89).

240 Tahayori et al. achieved a similar AUC (0.88) using only free-text history of presenting  
241 complaint. Tahayori et al. were the only authors that compared their model to emergency  
242 physician performance. Their model achieved a higher accuracy than five emergency  
243 consultants (0.83 vs 0.78) and higher specificity (0.86 vs 0.77), but lower sensitivity (0.72 vs  
244 0.9). Roquette et al. and Zhang et al. both compared ML models trained using structured data  
245 only with ML models that incorporated both structured data and text data. They found that  
246 the addition of text data results in a small improvement when compared to the use of  
247 structured data alone.

248

#### 249 **Prediction of critical illness**

250 Multimodal models were able to accurately predict critical illness in adult patients, defined as  
251 ICU admission, cardiopulmonary arrest within 24 hours, or death within 24 hours of  
252 triage.<sup>43-45</sup> Of the three studies that predicted critical illness at triage, Fernandes et al.  
253 achieved the highest AUC (0.96) in predicting in-hospital death or cardiopulmonary arrest  
254 within 24 hours of triage using an extreme gradient boosting model. They found no  
255 difference in AUC when using clinical variables only or clinical variables and structured  
256 chief complaint processed by NLP. Joseph et al. found their NLP model (AUC 0.857)  
257 significantly outperformed an abnormal vital sign trigger (AUC 0.521) and ESI score  $\leq 2$   
258 (AUC 0.672) in predicting critical illness. The addition of free-text data improved the  
259 performance of their neural network model (from AUC 0.820 to AUC 0.857).

260

#### 261 **Prediction of triage score**

262 NLP has been applied in multiple triage systems. NLP models and multimodal models were  
263 able to accurately assign triage categories using structured and free-text data.<sup>17, 36-38, 47, 48</sup>  
264 Wang et al. achieved the highest performance in predicting ESI using their "DeepTriager"

265 model (AUC 0.96). Kim et al. achieved an AUC of 0.89 in assigning a KTAS category to  
266 auto-transcribed simulated triage dialogue. This was only slightly lower than the performance  
267 achieved using human-transcribed simulated triage dialogue (AUC 0.90). Three studies  
268 compared the accuracy of triage scores assigned by multimodal models incorporating NLP to  
269 triage scores assigned by nurses.<sup>17, 36, 47</sup> Such models were more accurate than nurses in two  
270 out of three papers.<sup>36, 47</sup> The addition of text data compared to structured data alone improved  
271 performance in assigning triage score.<sup>36, 37</sup>

272

### 273 **Prediction of provider-assigned chief complaint**

274 NLP models and multimodal models incorporating NLP were able to accurately map free-  
275 text history of presenting complaint to structured chief complaints.<sup>42, 49</sup> Chang et al. (2020)  
276 used BERT to accurately predict provider-assigned chief complaint labels (Top-5 structured  
277 label AUC 0.92). Greenbaum et al. (2019) iteratively developed their own structured  
278 ontology and were eventually able to map 97.2% of presentations to their structured ontology  
279 using their NLP based predictive model.

280

### 281 **Prediction of investigations**

282 Multimodal models incorporating NLP were able to predict diagnostic imaging performed in  
283 the ED.<sup>39, 40</sup> Zhang et al. developed a model to predict need for advanced diagnostic imaging  
284 (computed tomography, ultrasound, magnetic resonance imaging) in the ED, and obtained an  
285 AUC 0.78 using a “bag-of-words” model. Zhang et al. were also able to predict the need for  
286 any diagnostic imaging in a paediatric population with an AUC 0.824. The inclusion of  
287 unstructured variables improved performance slightly in both cases.

288

### 289 **Identifying infection**

290 Horng et al. (2017) found that the incorporation of free-text data improves the discriminatory  
291 ability (increase in AUC from 0.67 to 0.86) for identifying sepsis (defined by ICD-9-CM  
292 code) in the ED at triage.

293

#### 294 **Multimodal models**

295 Eleven papers compared ML models that used only structured data to multimodal models that  
296 incorporated both structured data and free-text data.<sup>34-40, 43-46</sup> The best performing model in  
297 each of these papers incorporated free-text. The largest improvement in model performance  
298 from incorporating free-text was found by Horng et al. (increase in AUC from 0.67 to 0.86  
299 for identifying infection). The addition of free-text did not improve model AUC in one case,  
300 however, did improve model average precision.<sup>44</sup> There were no cases where the  
301 incorporation of free-text into the model resulted in worse performance. Six papers assessed  
302 models that used only free-text, with no structured data.<sup>30, 36, 37, 39, 40, 42</sup> Tahayori et al. were  
303 able to use only free-text data to predict admission with high accuracy (83%). Zhang et al.  
304 used free-text to predict performance of diagnostic imaging. Gligorijevic’s “Deep Attention”  
305 models using only unstructured data outperformed those using only structured data.  
306 Incorporating both structured data and free-text data improved results when compared to  
307 models that used only free-text data, though often only a small improvement was found.

308

#### 309 **Modern NLP compared to traditional NLP**

310 Three papers directly compared modern NLP based on DL to more traditional ML techniques  
311 such as bag-of-words and topic modelling.<sup>30, 38, 48</sup> Modern DL based NLP outperformed  
312 traditional ML based NLP in two cases.<sup>30, 38</sup> In contrast, Kim et al. found that a BERT based  
313 DL model did not perform better than ML based models, though their population was  
314 relatively small. Chang et al. compared the performance of multiple modern DL based

315 models, finding BERT slightly outperformed Embeddings from Language Models (ELMo)  
316 and Long Short-Term Memory (LSTM) networks in mapping free-text chief complaints to  
317 structured fields.

318

### 319 **Integration into practice**

320 Greenbaum et al. was the only study that reported the deployment of an NLP based model  
321 into clinical practice. Greenbaum et al. aimed to increase the ease of high-quality structured  
322 data collection at triage through the use of an NLP based model. Their model used both free-  
323 text triage notes and structured data to provide contextual autocomplete of chief complaint  
324 label, and also show the user a list of the top five most likely chief complaints. Prior to  
325 implementation of their model, 26.2% of patient encounters resulted in structured data  
326 capture. Following implementation this increased to 97.2%. The authors aggregated multiple  
327 incidents of unscheduled downtime that occurred throughout the study to assess the impact of  
328 their model. When ML based autocomplete was not operational (and instead alphabetised  
329 autocomplete was shown), the percent of encounters that resulted in structure data capture  
330 decreased from 97.2% to 89.2%. The number of keystrokes typed for each presenting  
331 problem decreased from 11.6 pre-implementation to 0.6 post implementation. Contextual  
332 autocomplete was associated with qualitatively more complete and higher quality structured  
333 documentation of chief complaints.

334

### 335 **Study quality—Risk of bias within and across studies**

336 A summary of the PROBAST assessment is provided in Table 2. Overall, 15 studies were  
337 considered to have a high risk of bias. Four studies were assessed as having a low risk of bias.  
338 One study had high applicability concerns and 18 studies had low applicability concerns. The

339 four studies assessed as having low risk of bias also had low applicability concerns. No  
340 studies referred to a previously published or publicly registered protocol.

341

#### 342 **Availability of datasets and code**

343 Availability of study datasets and code is shown in Table 3. Data was publicly available for  
344 three studies (all by Zhang et al.) and was available on request from study authors for a  
345 further four studies.<sup>30, 34, 35 39, 40 43, 44</sup> One study reported plans to release a modified de-  
346 identified dataset, however at the time of this review this is still pending approvals.<sup>45</sup> The  
347 model code was publicly available for two studies.<sup>42, 45</sup> Notably, the code repository from  
348 Chang et al. was well organised and contained clear instructions for researchers on how to  
349 download their pretrained model and apply it to their own dataset.

350

## 351 **DISCUSSION**

### 352 **NLP at triage**

353 This review finds that NLP has been applied to data available at the time of ED triage to  
354 predict a range of outcomes, with a focus on predicting need for admission and assigned  
355 triage score. The results of this review also highlight that unstructured free-text triage notes  
356 contain valuable information. Through NLP techniques, this information has started to  
357 become accessible to use for automated predictive purposes. The combination of free-text  
358 nursing triage notes with structured data appears to result in the best model performance,  
359 however free-text nursing triage notes alone can be used by NLP algorithms to predict need  
360 for admission and need for diagnostic imaging.<sup>18, 30, 39, 40</sup> A benefit of developing models that  
361 require only free-text as an input is that it may allow for easier portability of predictive  
362 models between different triage systems.<sup>30</sup>

363

364 **Structured data capture**

365 Accurate and consistent structured capture of patients' presenting complaints is important for  
366 research, service improvement, and public health initiatives.<sup>49</sup> Common medical ontologies  
367 also improve system interoperability.<sup>50</sup> However collection of structured data is often  
368 difficult, especially when contrasted with the ease and expressiveness of free-text entry.<sup>49</sup> In a  
369 rare singular example of NLP being deployed into routine clinical practice at ED triage,  
370 Greenbaum et al. developed, implemented, and prospectively evaluated an NLP driven user  
371 interface to mitigate the challenges of structured data capture.<sup>49</sup> Promisingly, they report that  
372 their NLP based contextual auto-predict did not add additional burden to users and made  
373 structured data collection easier than unstructured data collection. Because of this, structured  
374 data collection increased significantly.

375

376 **Improving ED workflow and efficiency**

377 ED overcrowding is a serious issue worldwide, with significant negative impact on patient  
378 morbidity and mortality. Having an emergency physician triage patients (or implementing a  
379 rapid assessment zone) enables early senior clinician input and decision making, and can lead  
380 to a reduced patient ED length of stay.<sup>51, 52</sup> Patient time spent in the waiting room is likely  
381 underutilised.<sup>52</sup> NLP could be applied to triage notes to predict which patients will likely  
382 require investigations such as blood tests or imaging, and in doing so allow for these  
383 investigations to be ordered immediately on arrival, rather than only being ordered after they  
384 are seen by a doctor. An emergency physician could review and then approve or reject  
385 suggested investigations. In this way, applying NLP to triage could leverage the expertise of  
386 the emergency physician.

387

388 Delays in specialist consultation and subsequent specialist review contribute to reduced ED  
389 throughput, and improvements in the consultation process from the ED have the potential to  
390 reduce ED length of stay.<sup>53</sup> Using NLP to identify at the point of triage, patients who are  
391 likely to require admission could assist with hospital resource allocation, improve patient  
392 flow, and allow for anticipation of system stressors, such as worsening access block.<sup>18, 30</sup> Bed  
393 allocation could begin at the time of patient triage, rather than hours into a patient's ED  
394 stay.<sup>30</sup> To fully realise the potential of predicting admission at triage, the NLP model would  
395 need to be supported by other infrastructure. For example, an "early admission team" could  
396 review patients who are flagged as very likely to be admitted, or stable patients not needing  
397 acute resuscitation could be diverted away from the ED and sent to the appropriate specialty  
398 team.

399

#### 400 **NLP compared to humans**

401 Human performance may be a reasonable baseline for ML models to meet to be considered  
402 accurate enough for implementation into clinical practice. Few studies have compared NLP  
403 models at triage to human performance. Such comparisons will be crucial in future work.  
404 Tahayori et al. was the only study that compared results from NLP models to emergency  
405 physicians.<sup>30</sup> Ivanov et al., Sterling et al, and Gligorijevic et al. compared NLP based models  
406 to nurses in assigning triage scores and found model accuracy was similar to nurses.<sup>17, 36, 47</sup>

407

#### 408 **Interpretability**

409 Few papers attempted to address human interpretability of models. While DL has been  
410 criticised as being a "black box", there is ongoing work to develop more "explainable AI".<sup>54</sup>  
411 <sup>55</sup> Wang et al. show how models could be somewhat more interpretable.<sup>38</sup> Their triage model  
412 is able to highlight free-text triage notes, with a darker colour corresponding to the sections



413 of text that was more heavily weighted by the model. This provides an initial "sense check"  
414 that humans can then combine with their own experience and knowledge.

415

#### 416 **Modern NLP**

417 While it is difficult to compare studies due to their heterogeneity, advanced DL based NLP  
418 appears to outperform traditional NLP. This is certainly the case when compared internally  
419 within studies and is consistent with previous NLP research.<sup>56</sup> BERT appears to be the most  
420 popular advanced NLP that has been used. BERT was released in October 2018 and at the  
421 time of release, BERT outperformed other NLP models.<sup>27</sup> However, of the 16 papers  
422 published since the release of BERT, only three have used it. Other large models have  
423 subsequently been released. For example, GPT-3 is a 175 billion parameter language model  
424 that was released in 2020 and is reported to outperform BERT in various circumstances.<sup>28</sup>  
425 Chowdhery et al. have recently published Pathways Language Model (PaLM), a 540-billion  
426 parameter model that achieves further increases in performance.<sup>29</sup>

427

#### 428 **FUTURE DIRECTIONS**

429 Triage is a promising place to start applying NLP in the ED. Large datasets with clearly  
430 labelled outcomes makes triage well suited to applications of ML. Triage information is often  
431 available hours before emergency physician documentation, and accurate predictions made at  
432 triage have the potential to increase healthcare system efficiency.<sup>18</sup> There is also the  
433 possibility of close human oversight if deployed in practice. Future work could aim to predict  
434 other important patient-oriented outcomes at the time of triage such as wait times, need for  
435 advanced cardiovascular investigations, or need for surgery.

436

#### 437 **Incorporating clinical gestalt**

438 Sterling et al. 2020 noted the difficulty in capturing the general clinical impression of the  
439 triage nurse.<sup>17</sup> Ivanov et al. also noted that important contextual aspects at triage were not  
440 available for consideration by ML models.<sup>47</sup> Future work could assess the impact of  
441 incorporating triage nurses' gestalt into predictive models. This could be expanded to also  
442 capture patients' predictions regarding their need for admission to hospital. Other contextual  
443 data available at the time of triage such as the number of patients currently waiting, the  
444 number of patients currently in the ED, and number of admitted patients in the hospital could  
445 also be incorporated into ML models.

446

#### 447 **Integration with other AI systems**

448 There are opportunities to integrate NLP as part of a larger AI based system. Kim et al.  
449 provides an interesting example of how various AI based technologies can be combined.<sup>48</sup>  
450 Speech recognition could be used to automatically generate a transcript of the entire triage  
451 conversation, which could then be used by NLP models. However, the performance of speech  
452 recognition technologies would likely deteriorate in a noisy ED, and combining multiple  
453 complex AI based technologies raises the possibility that small initial errors could be  
454 amplified as they propagate through the models. NLP models at triage could also be  
455 integrated with other novel AI based interventions, such as automated monitoring of patients'  
456 vital signs while they are in the waiting room, or with data entered by patients themselves in  
457 AI based self-triage applications.

458

#### 459 **Pre-trained models for ED triage**

460 Publicly available large DL based language models have often been trained on corpuses  
461 containing text from newspapers, books, and websites.<sup>27, 28</sup> Triage notes are often quite short  
462 and contain a number of unique and idiosyncratic abbreviations and acronyms not common in

463 everyday English language.<sup>17, 30</sup> The benefits of applying DL based NLP models to triage  
464 notes may yet to be fully realised, as they were not developed for triage specific purposes.  
465 DL based NLP models that have been fine-tuned on large corpuses of medical text have been  
466 released, however they have not been applied to ED triage. Large publicly available clinical  
467 databases such as MIMIC-IV that contain ED triage notes with linked outcomes are likely to  
468 be helpful in further model development and may facilitate direct comparisons between  
469 models developed by different research groups.<sup>57, 58</sup> Triage focused NLP research could also  
470 benefit from groups sharing large language models that have been pre-trained on triage data.  
471 These models could be used as starting points by others, though it is unknown whether such  
472 models' performance would generalise across different healthcare settings and triage systems.  
473 It is also unknown if the length of triage notes impacts model performance. This could be  
474 evaluated in future work.

475

#### 476 **Prospective and external validation is needed**

477 The majority of research so far has been retrospective and completed in the USA. There is a  
478 significant need for prospective evaluation and external validation, especially in other  
479 countries and triage systems.

480

#### 481 **Clinical impact and risk**

482 NLP models have rarely been deployed at ED triage. As such, it is unknown what impact  
483 these tools could have on clinical practice. The introduction of a new tool into a complex  
484 system is likely to have unintended consequences, and use of the tool may itself change  
485 practice. Triage notes may be written in a different way if it is known that they are being used  
486 for predictive purposes. There may also be unintended harms. For example, telling a patient  
487 at triage that they are likely to be admitted or to have a long wait time, could influence their

488 behaviour and increase the number of patients who leave without being seen. It may be useful  
489 to establish the performance benchmarks predictive models must meet prior to  
490 implementation into clinical practice. This could be done through further studies comparing  
491 NLP model performance to emergency physicians and nurses. Further research is also  
492 required to understand how to best integrate early admission predictions into hospital systems  
493 and clinical practice.

494

495 NLP models can be retrained and updated as new data becomes available. Therefore, model  
496 performance may change over time. It will be important to ensure that there is appropriate  
497 algorithm stewardship in place prior to clinical use.<sup>59</sup> Predictive models are trained on data  
498 that reflects current practice. This engrains the assumption that current practice is appropriate,  
499 which may not be the case.

500

### 501 **Acceptability**

502 It is also unknown if the use of NLP at triage is acceptable to patients and staff. It will be  
503 important to involve clinicians, patients, and healthcare consumer groups in the development  
504 and governance of any future implementation projects. It will also be important to ensure that  
505 these systems do not place further burden on users. Ease of use and perceived clinical impact  
506 will likely be important factors for adoption by clinicians.

507

### 508 **Ethical issues**

509 Race, age, and gender biases at ED triage have been previously reported.<sup>60-62</sup> Concerns over  
510 bias in ML models have been well described, and new tools are being developed to assess  
511 such biases.<sup>63-65</sup> At its best, NLP at triage could help reduce bias through standardising triage  
512 decisions and providing a more objective triage score. However, at its worst NLP at triage

513 could further ingrain existing biases into practice, under the guise of objectivity and hidden in  
514 the opacity of abstract algorithms. Patient apprehensions and concerns about the use of AI  
515 will also need to be considered. While the emerging body of literature shows patients view  
516 AI largely positively, they do have some concerns with its use in healthcare.<sup>66</sup> These include  
517 perceptions that AI is less accurate than clinicians, there is a lack of transparency in  
518 predictions, and there are risks to the privacy of their personal healthcare data.<sup>67-72</sup> Further  
519 research investigating the impact of NLP based tools on vulnerable and minority populations  
520 is warranted.

521

## 522 **LIMITATIONS**

### 523 **Study level**

524 Only one study contained prospectively validated results, and no studies contained results  
525 that were externally validated at a separate site. Results reported may not be generalisable to  
526 other settings. There was inconsistent reporting of methods and results among studies. The  
527 majority of studies (79%) were assessed to have a high risk of bias.

528

### 529 **Review level**

530 Heterogeneity of the included studies precluded meta-analysis which limits the level of  
531 evidence this review provides. All studies reported positive results for NLP at triage, which  
532 may reflect publication bias. While we took significant care to ensure our search strategy was  
533 broad enough to capture all relevant literature, the variety of NLP and ML terminology  
534 means that some studies may have been missed. Non-English articles, and articles published  
535 prior to 2012 were also excluded from our search.

536

## 537 **CONCLUSION**

538 The use of NLP at triage appears feasible and could accurately predict important patient-  
539 oriented outcomes including need for admission and need for critical care. However, there are  
540 few examples of implementation into clinical practice and most research is retrospective. The  
541 potential benefits of using NLP at triage are yet to be realised. Further research is needed to  
542 prospectively assess the acceptability and impact of implementing NLP at triage on staff,  
543 patients, and the healthcare system.

544

545

546

547

548

549

550

551

## 552 **Funding**

553 This project was supported by the Western Australian Health Translation Network's Health  
554 Service Translational Research Project and the Australian Government's Medical Research  
555 Future Fund (MRFF) as part of the Rapid Applied Research Translation program. Authors  
556 who received grant: JS, GD, MB, PS, FS Funder Website: <https://wahtn.org/> The funders had  
557 no role in study design, data collection and analysis, decision to publish, or preparation of the  
558 manuscript.

559

## 560 **Competing Interested**

561 No authors declare any competing interests.

562

563 **REFERENCES**

- 564 1. Morley C, Unwin M, Peterson GM, Stankovich J, Kinsman L. Emergency department  
565 crowding: A systematic review of causes, consequences and solutions. *PLoS One*.  
566 2018;13(8):e0203316.  
567
- 568 2. Iserson KV, Moskop JC. Triage in medicine, part I: Concept, history, and types. *Ann*  
569 *Emerg Med*. 2007 Mar;49(3):275–81.  
570
- 571 3. Hinson JS, Martinez DA, Cabral S, George K, Whalen M, Hansoti B, et al. Triage  
572 performance in emergency medicine: a systematic review. *Ann Emerg Med*. 2019  
573 Jul;74(1):140–52.  
574
- 575 4. Cameron P, Little M, Mitra B, Deasy C, editors. *Textbook of adult emergency medicine*.  
576 Fifth edition. Edinburgh: Elsevier; 2020.  
577
- 578 5. Park JB, Lim TH. Korean Triage and Acuity Scale (KTAS). *Journal of The Korean Society*  
579 *of Emergency Medicine*. 2017;28(6):547–51.  
580
- 581 6. Zachariasse JM, van der Hagen V, Seiger N, Mackway-Jones K, van Veen M, Moll HA.  
582 Performance of triage systems in emergency care: a systematic review and meta-analysis.  
583 *BMJ Open*. 2019 May 28;9(5):e026471.  
584
- 585 7. Jeppesen E, Cuevas-Østrem M, Gram-Knutsen C, Uleberg O. Undertriage in trauma: an  
586 ignored quality indicator? *Scand J Trauma Resusc Emerg Med*. 2020 May 6;28(1):34.  
587
- 588 8. Banco D, Chang J, Talmor N, Wadhwa P, Mukhopadhyay A, Lu X, et al. Sex and race  
589 differences in the evaluation and treatment of young adults presenting to the emergency  
590 department with chest pain. *J Am Heart Assoc*. 2022 May 17;11(10):e024199.  
591
- 592 9. Murphy KP. *Machine learning: a probabilistic perspective*. Cambridge, Mass.: MIT Press;  
593 2012.  
594

- 595 10. Stewart J, Sprivulis P, Dwivedi G. Artificial intelligence and machine learning in  
596 emergency medicine. *Emerg Med Australas*. 2018 Dec;30(6):870–4.  
597
- 598 11. Kareemi H, Vaillancourt C, Rosenberg H, Fournier K, Yadav K. Machine learning versus  
599 usual care for diagnostic and prognostic prediction in the emergency department: a  
600 systematic review. *Acad Emerg Med*. 2021 Feb;28(2):184–96.  
601
- 602 12. Stewart J, Lu J, Goudie A, Bennamoun M, Sprivulis P, Sanfillipo F, et al. Applications of  
603 machine learning to undifferentiated chest pain in the emergency department: A systematic  
604 review. *PLoS One*. 2021;16(8):e0252612.  
605
- 606 13. Levin S, Toerper M, Hamrock E, Hinson JS, Barnes S, Gardner H, et al. Machine-  
607 learning-based electronic triage more accurately differentiates patients with respect to clinical  
608 outcomes compared with the emergency severity index. *Ann Emerg Med*. 2018  
609 May;71(5):565-574.e2.  
610
- 611 14. Sánchez-Salmerón R, Gómez-Urquiza JL, Albendín-García L, Correa-Rodríguez M,  
612 Martos-Cabrera MB, Velando-Soriano A, et al. Machine learning methods applied to triage in  
613 emergency services: A systematic review. *Int Emerg Nurs*. 2022 Jan;60:101109.  
614
- 615 15. Hong WS, Haimovich AD, Taylor RA. Predicting hospital admission at emergency  
616 department triage using machine learning. *PLoS One*. 2018;13(7):e0201016.  
617
- 618 16. Kwon JM, Lee Y, Lee Y, Lee S, Park H, Park J. Validation of deep-learning-based triage  
619 and acuity score using a large national dataset. *PLoS One*. 2018;13(10):e0205836.  
620
- 621 17. Sterling NW, Brann F, Patzer RE, Di M, Koebbe M, Burke M, et al. Prediction of  
622 emergency department resource requirements during triage: An application of current natural  
623 language processing techniques. *J Am Coll Emerg Physicians Open*. 2020 Dec;1(6):1676–83.  
624
- 625 18. Sterling NW, Patzer RE, Di M, Schragger JD. Prediction of emergency department patient  
626 disposition based on natural language processing of triage notes. *Int J Med Inform*. 2019  
627 Sep;129:184–8.  
628



- 629 19. Spasic I, Nenadic G. Clinical text data in machine learning: systematic review. JMIR  
630 Med Inform. 2020 Mar 31;8(3):e17984.  
631
- 632 20. Leaman R, Khare R, Lu Z. Challenges in clinical natural language processing for  
633 automated disorder normalization. J Biomed Inform. 2015 Oct;57:28–37.  
634
- 635 21. Russell SJ, Norvig P, Davis E. Artificial intelligence: a modern approach. 3rd ed. Upper  
636 Saddle River: Prentice Hall; 2010  
637
- 638 22. Manning CD, Schütze H. Foundations of statistical natural language processing.  
639 Cambridge, Mass: MIT Press; 1999.  
640
- 641 23. Juluru K, Shih HH, Keshava Murthy KN, Elnajjar P. Bag-of-words technique in natural  
642 language processing: a primer for radiologists. Radiographics. 2021;41(5):1420–6.  
643
- 644 24. Young T, Hazarika D, Poria S, Cambria E. Recent trends in deep learning based natural  
645 language processing [review article]. IEEE Computational Intelligence Magazine. 2018  
646 Aug;13(3):55–75.  
647
- 648 25. Wu S, Roberts K, Datta S, Du J, Ji Z, Si Y, et al. Deep learning in clinical natural  
649 language processing: a methodical review. J Am Med Inform Assoc. 2020 Mar 1;27(3):457–  
650 70.  
651
- 652 26. LeCun Y, Bengio Y, Hinton G. Deep learning. Nature. 2015 May 28;521(7553):436–44.  
653
- 654 27. Devlin J, Chang MW, Lee K, Toutanova K. Bert: pre-training of deep bidirectional  
655 transformers for language understanding. In: Proceedings of the 2019 Conference of the  
656 North American Chapter of the Association for Computational Linguistics: Human Language  
657 Technologies, Volume 1 (Long and Short Papers) [Internet]. Minneapolis, Minnesota:  
658 Association for Computational Linguistics; 2019 [cited 2022 Apr 6]. p. 4171–86. Available  
659 from: <https://aclanthology.org/N19-1423>  
660
- 661 28. Brown T, Mann B, Ryder N, Subbiah M, Kaplan JD, Dhariwal P, et al. Language models  
662 are few-shot learners. In: Advances in Neural Information Processing Systems [Internet].

- 663 Curran Associates, Inc.; 2020 [cited 2022 Apr 8]. p. 1877–901. Available from:  
664 <https://papers.nips.cc/paper/2020/file/1457c0d6bfc4967418bfb8ac142f64a-Paper.pdf>  
665
- 666 29. Chowdhery A, Narang S, Devlin J, Bosma M, Mishra G, Roberts A, et al. Palm: scaling  
667 language modeling with pathways [Internet]. arXiv; 2022 [cited 2022 Apr 5]. Available from:  
668 <http://arxiv.org/abs/2204.02311>  
669
- 670 30. Tahayori B, Chini-Foroush N, Akhlaghi H. Advanced natural language processing  
671 technique to predict patient disposition based on emergency triage notes. *Emerg Med*  
672 *Australas* [Internet]. 2020;33(3):480–4. Available from: [http://dx.doi.org/10.1111/1742-](http://dx.doi.org/10.1111/1742-6723.13656)  
673 [6723.13656](http://dx.doi.org/10.1111/1742-6723.13656)  
674
- 675 31. Moher D, Shamseer L, Clarke M, Ghersi D, Liberati A, Petticrew M, et al. Preferred  
676 reporting items for systematic review and meta-analysis protocols (Prisma-p) 2015 statement.  
677 *Syst Rev*. 2015 Jan 1;4(1):1.  
678
- 679 32. Page MJ, McKenzie JE, Bossuyt PM, Boutron I, Hoffmann TC, Mulrow CD, et al. The  
680 PRISMA 2020 statement: an updated guideline for reporting systematic reviews. *BMJ*. 2021  
681 Mar 29;372:n71.  
682
- 683 33. Wolff RF, Moons KGM, Riley RD, Whiting PF, Westwood M, Collins GS, et al. Probast:  
684 a tool to assess the risk of bias and applicability of prediction model studies. *Ann Intern Med*.  
685 2019 Jan 1;170(1):51–8.  
686
- 687 34. Horng S, Sontag DA, Halpern Y, Jernite Y, Shapiro NI, Nathanson LA. Creating an  
688 automated trigger for sepsis clinical decision support at emergency department triage using  
689 machine learning. *PLoS One*. 2017;12(4):e0174708.  
690
- 691 35. Zhang X, Kim J, Patzer RE, Pitts SR, Patzer A, Schrage JD. Prediction of emergency  
692 department hospital admission based on natural language processing and neural networks.  
693 *Methods Inf Med*. 2017 Oct 26;56(5):377–89.  
694
- 695 36. Gligorijevic D, Stojanovic J, Satz W, Stojkovic I, Schreyer K, Del Portal D, et al. Deep  
696 attention model for triage of emergency department patients. In: *Proceedings of the 2018*

- 697 SIAM International Conference on Data Mining (SDM) [Internet]. Society for Industrial and  
698 Applied Mathematics; 2018 [cited 2022 Dec 17]. p. 297–305. (Proceedings). Available from:  
699 <https://epubs.siam.org/doi/abs/10.1137/1.9781611975321.34>  
700
- 701 37. Choi SW, Ko T, Hong KJ, Kim KH. Machine learning-based prediction of korean triage  
702 and acuity scale level in emergency department patients. *Healthc Inform Res*. 2019  
703 Oct;25(4):305–12.  
704
- 705 38. Wang G, Liu X, Xie K, Chen N, Chen T. Deeptriager: a neural attention model for  
706 emergency triage with electronic health records. In: 2019 IEEE International Conference on  
707 Bioinformatics and Biomedicine (BIBM). 2019. p. 978–82.  
708
- 709 39. Zhang X, Bellolio MF, Medrano-Gracia P, Werys K, Yang S, Mahajan P. Use of natural  
710 language processing to improve predictive models for imaging utilization in children  
711 presenting to the emergency department. *BMC Med Inform Decis Mak*. 2019 Dec  
712 30;19(1):287.  
713
- 714 40. Zhang X, Kim J, Patzer RE, Pitts SR, Chokshi FH, Schrager JD. Advanced diagnostic  
715 imaging utilization during emergency department visits in the United States: A predictive  
716 modeling study for emergency department triage. *PLoS One*. 2019;14(4):e0214905.  
717
- 718 41. Arnaud É, Elbattah M, Gignon M, Dequen G. Deep learning to predict hospitalization at  
719 triage: integration of structured data and unstructured text. In: 2020 IEEE International  
720 Conference on Big Data (Big Data). 2020. p. 4836–41.  
721
- 722 42. Chang D, Hong WS, Taylor RA. Generating contextual embeddings for emergency  
723 department chief complaints. *JAMIA Open*. 2020 Jul;3(2):160–6.  
724
- 725 43. Fernandes M, Mendes R, Vieira SM, Leite F, Palos C, Johnson A, et al. Predicting  
726 Intensive Care Unit admission among patients presenting to the emergency department using  
727 machine learning and natural language processing. *PLoS One*. 2020;15(3):e0229331.  
728

- 729 44. Fernandes M, Mendes R, Vieira SM, Leite F, Palos C, Johnson A, et al. Risk of mortality  
730 and cardiopulmonary arrest in critical patients presenting to the emergency department using  
731 machine learning and natural language processing. *PLoS One*. 2020;15(4):e0230876.  
732
- 733 45. Joseph JW, Leventhal EL, Grossestreuer AV, Wong ML, Joseph LJ, Nathanson LA, et al.  
734 Deep-learning approaches to identify critically ill patients at emergency department triage  
735 using limited information. *J Am Coll Emerg Physicians Open*. 2020 Oct;1(5):773–81.  
736
- 737 46. Roquette BP, Nagano H, Marujo EC, Maiorano AC. Prediction of admission in pediatric  
738 emergency department with deep neural networks and triage textual data. *Neural Netw*. 2020  
739 Jun;126:170–7.  
740
- 741 47. Ivanov O, Wolf L, Brecher D, Lewis E, Masek K, Montgomery K, et al. Improving ed  
742 emergency severity index acuity assignment using machine learning and clinical natural  
743 language processing. *J Emerg Nurs*. 2021 Mar;47(2):265-278.e7.  
744
- 745 48. Kim D, Oh J, Im H, Yoon M, Park J, Lee J. Automatic classification of the korean triage  
746 acuity scale in simulated emergency rooms using speech recognition and natural language  
747 processing: a proof of concept study. *J Korean Med Sci*. 2021 Jul 12;36(27):e175.  
748
- 749 49. Greenbaum NR, Jernite Y, Halpern Y, Calder S, Nathanson LA, Sontag DA, et al.  
750 Improving documentation of presenting problems in the emergency department using a  
751 domain-specific ontology and machine learning-driven user interfaces. *Int J Med Inform*.  
752 2019 Dec;132:103981.  
753
- 754 50. Liyanage H, Krause P, De Lusignan S. Using ontologies to improve semantic  
755 interoperability in health data. *J Innov Health Inform*. 2015 Jul 10;22(2):309–15.  
756
- 757 51. Abdulwahid MA, Booth A, Kuczawski M, Mason SM. The impact of senior doctor  
758 assessment at triage on emergency department performance measures: systematic review and  
759 meta-analysis of comparative studies. *Emerg Med J*. 2016 Jul;33(7):504–13.  
760

- 761 52. Begaz T, Elashoff D, Grogan TR, Talan D, Taira BR. Initiating diagnostic studies on  
762 patients with abdominal pain in the waiting room decreases time spent in an emergency  
763 department bed: a randomized controlled trial. *Ann Emerg Med*. 2017 Mar;69(3):298–307.  
764
- 765 53. Asplin BR, Magid DJ, Rhodes KV, Solberg LI, Lurie N, Camargo CA. A conceptual  
766 model of emergency department crowding. *Ann Emerg Med*. 2003 Aug;42(2):173–80.  
767
- 768 54. Adadi A, Berrada M. Peeking inside the black-box: a survey on explainable artificial  
769 intelligence (Xai). *IEEE Access*. 2018;6:52138–60.  
770
- 771 55. Linardatos P, Papastefanopoulos V, Kotsiantis S. Explainable ai: a review of machine  
772 learning interpretability methods. *Entropy (Basel)*. 2020 Dec 25;23(1):E18.  
773
- 774 56. Li H. Deep learning for natural language processing: advantages and challenges. *National*  
775 *Science Review* [Internet]. 2018 Jan 1 [cited 2022 Jun 16];5(1):24–6. Available from:  
776 <https://academic.oup.com/nsr/article/5/1/24/4107792>  
777
- 778 57. Johnson, Alistair, Bulgarelli, Lucas, Pollard, Tom, Celi, Leo Anthony, Mark, Roger,  
779 Horng, Steven. Mimic-iv-ed [Internet]. *PhysioNet*; [cited 2022 Jun 22]. Available from:  
780 <https://physionet.org/content/mimic-iv-ed/2.0/>  
781
- 782 58. Goldberger AL, Amaral LA, Glass L, Hausdorff JM, Ivanov PC, Mark RG, et al.  
783 *PhysioBank*, *PhysioToolkit*, and *PhysioNet*: components of a new research resource for  
784 complex physiologic signals. *Circulation*. 2000 Jun 13;101(23):E215-220.  
785
- 786 59. Eaneff S, Obermeyer Z, Butte AJ. The case for algorithmic stewardship for artificial  
787 intelligence and machine learning technologies. *JAMA*. 2020 Oct 13;324(14):1397–8.  
788
- 789 60. Schrader CD, Lewis LM. Racial disparity in emergency department triage. *J Emerg Med*.  
790 2013 Feb;44(2):511–8.  
791
- 792 61. Kuhn L, Page K, Rolley JX, Worrall-Carter L. Effect of patient sex on triage for  
793 ischaemic heart disease and treatment onset times: A retrospective analysis of Australian  
794 emergency department data. *Int Emerg Nurs*. 2014 Apr;22(2):88–93.

795

796 62. Vigil JM, Coulombe P, Alcock J, Kruger E, Stith SS, Strenth C, et al. Patient ethnicity  
797 affects triage assessments and patient prioritization in u. S. Department of veterans affairs  
798 emergency departments. *Medicine (Baltimore)*. 2016 Apr;95(14):e3191.

799

800 63. Gianfrancesco MA, Tamang S, Yazdany J, Schmajuk G. Potential biases in machine  
801 learning algorithms using electronic health record data. *JAMA Intern Med*. 2018 Nov  
802 1;178(11):1544–7.

803

804 64. Linardatos P, Papastefanopoulos V, Kotsiantis S. Explainable ai: a review of machine  
805 learning interpretability methods. *Entropy (Basel)*. 2020 Dec 25;23(1):18.

806

807 65. Vokinger KN, Feuerriegel S, Kesselheim AS. Mitigating bias in machine learning for  
808 medicine. *Commun Med (Lond)*. 2021 Aug 23;1:25.

809

810 66. Young AT, Amara D, Bhattacharya A, Wei ML. Patient and general public attitudes  
811 towards clinical artificial intelligence: a mixed methods systematic review. *Lancet Digit  
812 Health*. 2021 Sep;3(9):e599–611.

813

814 67. Ongena YP, Haan M, Yakar D, Kwee TC. Patients' views on the implementation of  
815 artificial intelligence in radiology: development and validation of a standardized  
816 questionnaire. *Eur Radiol*. 2020 Feb;30(2):1033–40.

817

818 68. Bala S, Keniston A, Burden M. Patient perception of plain-language medical notes  
819 generated using artificial intelligence software: pilot mixed-methods study. *JMIR Form Res*.  
820 2020 Jun 5;4(6):e16670.

821

822 69. Nelson CA, Pérez-Chada LM, Creadore A, Li SJ, Lo K, Manjaly P, et al. Patient  
823 perspectives on the use of artificial intelligence for skin cancer screening: a qualitative study.  
824 *JAMA Dermatol*. 2020 May 1;156(5):501–12.

825

826 70. Jutzi TB, Krieghoff-Henning EI, Holland-Letz T, Utikal JS, Hauschild A, Schadendorf D,  
827 et al. Artificial intelligence in skin cancer diagnostics: the patients' perspective. *Front Med  
828 (Lausanne)*. 2020;7:233.

829

830 71. Nadarzynski T, Miles O, Cowie A, Ridge D. Acceptability of artificial intelligence (Ai)-  
831 led chatbot services in healthcare: A mixed-methods study. Digit Health.  
832 2019;5:2055207619871808.

833

834 72. Palmisciano P, Jamjoom AAB, Taylor D, Stoyanov D, Marcus HJ. Attitudes of patients  
835 and their relatives toward artificial intelligence in neurosurgery. World Neurosurg. 2020  
836 Jun;138:e627–33.

| Year | First Author | Country     | Study design  | Primary Outcome                               | Sites                  | Population                                        | Input data                                                                                                                                                                                   | NLP/ML Model                                 | Comparison                                                                      | Results                                                                                                                                                                         |
|------|--------------|-------------|---------------|-----------------------------------------------|------------------------|---------------------------------------------------|----------------------------------------------------------------------------------------------------------------------------------------------------------------------------------------------|----------------------------------------------|---------------------------------------------------------------------------------|---------------------------------------------------------------------------------------------------------------------------------------------------------------------------------|
| 2021 | Kim          | South Korea | Retrospective | Assignment of triage score (KTAS).            | Single-centre (1 site) | 762 simulated triage cases                        | Human transcribed and ML-transcribed simulated triage dialogue                                                                                                                               | BERT                                         | SVM, KNN, RF                                                                    | Model performance with IBM's auto-transcribed test dataset.<br>BERT-KTAS AUC 0.82 (0.75–0.87)<br>SVM AUC 0.86 (0.81–0.90)<br>KNN AUC 0.89 (0.85–0.93)<br>RF AUC 0.86 (0.82–0.9) |
| 2021 | Ivanov       | USA         | Retrospective | Assignment of triage score (ESI).             | Multi-centre (2 sites) | 147 052 patient encounters (age 1 year or older)  | Blood glucose, chief complaint (free-text), demographics, FHx, history of presenting complaint (free-text), mental status, mode of arrival, pain score, SHx, vitals                          | Clinical-NLP (developed by authors), XGBoost | Nurse triage                                                                    | ML Model AUC 0.85<br>Nurse triage AUC 0.75                                                                                                                                      |
| 2020 | Tahayori     | Australia   | Retrospective | Patient disposition (admission or discharge). | Single-centre (1 site) | 249 532 patient encounters (adult)                | History of presenting complaint (free-text)                                                                                                                                                  | BERT                                         | Emergency consultants (5), Bag-of-words                                         | BERT AUC 0.88 Accuracy 0.83<br>Emergency Consultant Accuracy 0.78<br>Bag-of-words AUC 0.77 Accuracy 0.72                                                                        |
| 2020 | Sterling     | USA         | Retrospective | Assignment of triage score (ESI).             | Multi-centre (3 sites) | 226 317 patient encounters (adult and paediatric) | Chief complaint (structured), demographics, history of presenting complaint (free-text), medication, mental status, mode of arrival, pain score, PMHx, vitals                                | LSTM                                         | Emergency nurses (2)                                                            | Model predictions (on nursing prediction subset)<br>F1 = 0.589 Accuracy 0.659<br>Nurse predictions (on 1000 presentations)<br>F1 = 0.592 Accuracy 0.690                         |
| 2020 | Roquette     | Brazil      | Retrospective | Patient disposition (admission or discharge). | Single-centre (1 site) | 499 853 patient encounters (paediatric)           | Blood glucose, chief complaint (free-text), demographics, history of presenting complaint (free-text), medication, pain score, past investigation requests, PMHx, triage score (MTS), vitals | LSTM                                         | SVM<br>ElasticNet<br>DNN<br>Catboost (structured)<br>XGBoost<br>Catboost (text) | SVM AUC 0.687<br>ElasticNet AUC 0.840<br>CatBoost without text features AUC 0.872<br>DNN AUC 0.877<br>XGBoost AUC 0.890<br>CatBoost with text features AUC 0.891                |



|           |           |                  |               |                                                                                                                                        |                        |                                                                                                      |                                                                                                                                                                                      |                                                                    |                                                                                  |                                                                                                                                                                                                                |
|-----------|-----------|------------------|---------------|----------------------------------------------------------------------------------------------------------------------------------------|------------------------|------------------------------------------------------------------------------------------------------|--------------------------------------------------------------------------------------------------------------------------------------------------------------------------------------|--------------------------------------------------------------------|----------------------------------------------------------------------------------|----------------------------------------------------------------------------------------------------------------------------------------------------------------------------------------------------------------|
| 020       | Joseph    | USA              | Retrospective | Identification of critical illness (death within 24 hours of arrival, ICU admission from the ED or within 24 hours of ward admission). | Single-centre (1 site) | 445 925 patient encounters (adult)                                                                   | Demographics, chief complaint (free-text), triage score (ESI), vitals                                                                                                                | LSTM+DNN                                                           | DNN (structured data only), LR, XGBoost, Abnormal vital sign trigger, ESI score. | Abnormal vital sign trigger AUC 0.521<br>ESI score $\leq 2$ AUC 0.672<br>LR AUC 0.804<br>Structured data only<br>DNN AUC 0.812<br>XGBoost AUC 0.820<br>Combined structured and text data<br>LSTM+DNN AUC 0.857 |
| 020<br>1) | Fernandes | Portugal,<br>USA | Retrospective | Identification of critical illness (ICU admission within 24 hours of triage).                                                          | Multi-centre (2 sites) | Site one<br>120 649 patient encounters (adult)<br><br>Site two<br>235 826 patient encounters (adult) | Blood glucose, chief complaint (structured and free-text), exams prescribed at triage, mental status, mode of arrival, pain score, time of triage, triage score (ESI or MTS), vitals | Term frequency–inverse document frequency (TF-idf) + LR            | LR model trained using only triage priorities (ESI or MTS)                       | Site 1<br>ESI only<br>LR AUC 0.78<br>ESI + clinical variables + chief complaint<br>LR AUC 0.92<br>Site 2<br>MTS only<br>LR 0.74<br>MTS + clinical variables + chief complaint<br>LR 0.86                       |
| 020<br>2) | Fernandes | Portugal,<br>USA | Retrospective | Identification of critical illness (in-hospital death or cardiopulmonary arrest within 24 hours of triage).                            | Single-centre (1 site) | 235 826 patient encounters (adult)                                                                   | Blood glucose, chief complaint (free-text), exams prescribed at triage, mental status, mode of arrival, pain scale, time of triage, vitals                                           | Term frequency–inverse document frequency (TF-idf) + LR/RF/XGBoost | LR trained using only triage priorities (ESI).                                   | ESI only<br>LR AUC 0.85<br>Clinical variables only<br>XGBoost AUC of 0.96<br>Clinical variables + chief complaint<br>XGBoost AUC 0.96                                                                          |
| 020       | Chang     | USA              | Retrospective | Prediction of provider-assigned chief complaint label.                                                                                 | Multi-centre (7 sites) | 1 799 365 free-text chief complaints (adult and paediatric)                                          | History of presenting complaint (free-text)                                                                                                                                          | BERT                                                               | LSTM, ELMo                                                                       | Full dataset (434 labels)<br><br>BERT Accuracy Top-1 0.65 Top-5 0.92<br>ELMo Accuracy Top-1 0.63 Top-5 0.90<br>LSTM Accuracy Top-1 0.63 Top-5 0.90                                                             |

|        |        |        |               |                                                                   |                          |                                                  |                                                                                                                                                                                                                                 |                                                  |                  |                                                                                                                                                                     |
|--------|--------|--------|---------------|-------------------------------------------------------------------|--------------------------|--------------------------------------------------|---------------------------------------------------------------------------------------------------------------------------------------------------------------------------------------------------------------------------------|--------------------------------------------------|------------------|---------------------------------------------------------------------------------------------------------------------------------------------------------------------|
| 020    | Arnaud | France | Retrospective | Patient disposition (admission or discharge).                     | Single-centre (1 site)   | Approximately 190 000 patient encounters (adult) | Arrival time, bladder volume, blood glucose, breath alcohol, capillary haemoglobin, capillary ketones, demographics, history of presenting complaint (free-text), mode of arrival, pain, PMHx (free-text), triage score, vitals | CNN (textual data) + ANN (structured data)       | None             | CNN+ANN<br>AUC $\approx$ 0.83                                                                                                                                       |
| 019 1) | Zhang  | USA    | Retrospective | Use of advanced diagnostic imaging (CT, US, MRI) during ED visit. | Multi-centre (300 sites) | 139 150 presentations (adult)                    | Arrival time, demographics, history of presenting complaint (free-text), mode of arrival, pain scale, PMHx, triage score, vitals, whether the visit was related to an injury/poisoning/adverse effect of medical treatment      | Latent Dirichlet Allocation (LDA) algorithm + LR | None             | Any advanced diagnostic imaging use<br>LDA + LR<br>Unstructured variables AUC 0.74<br>Structured variables AUC 0.69<br>Unstructured + Structured variables AUC 0.78 |
| 019 2) | Zhang  | USA    | Retrospective | Performance of any diagnostic imaging during ED visit.            | Multi-centre (300 sites) | 27 665 patient encounters (paediatric)           | Arrival time, demographics, history of presenting complaint (free-text), mode of arrival, pain scale, PMHx, triage score, vitals, whether the visit was related to an injury/poisoning/adverse effect of medical treatment      | BoW + PCA + LR                                   | None             | BoW + PCA + LR<br>Any imaging<br>Unstructured variables AUC 0.810<br>Structured variables AUC 0.706<br>Unstructured + structured AUC 0.824                          |
| 019    | Wang   | China  | Retrospective | Assignment of triage score.                                       | Single-centre (1 site)   | 70 918 patient encounters (adult)                | Chief complaint (free-text), demographics, history of presenting complaint (free-text), physical examination (free-text), vitals                                                                                                | “DeepTriager” model (based on LSTM+DNN)          | NEWS + LR/BOW/RF | NEWS + LR AUC 0.8631<br>NEWS + BOW + LR AUC 0.9016<br>NEWS + BOW + RF AUC 0.9257<br>NEWS + LSTM AUC 0.9525<br>“DeepTriager” AUC 0.9594                              |

|     |              |             |                                |                                                                                                            |                          |                                                                                       |                                                                                                                                                                                                            |                                                |                                                       |                                                                                                                                                                                                                                                                                                                                      |
|-----|--------------|-------------|--------------------------------|------------------------------------------------------------------------------------------------------------|--------------------------|---------------------------------------------------------------------------------------|------------------------------------------------------------------------------------------------------------------------------------------------------------------------------------------------------------|------------------------------------------------|-------------------------------------------------------|--------------------------------------------------------------------------------------------------------------------------------------------------------------------------------------------------------------------------------------------------------------------------------------------------------------------------------------|
| 019 | Sterling     | USA         | Retrospective                  | Patient disposition (admission or discharge).                                                              | Multi-centre (3 sites)   | 256 878 patient encounters.                                                           | History of presenting complaint (free-text)                                                                                                                                                                | Paragraph vectors/BoW/Topic modelling + ANN    | None                                                  | Paragraph vector + ANN AUC=0.737<br>Bag-of-words + ANN AUC=0.785<br>Topic modelling + ANN AUC 0.687                                                                                                                                                                                                                                  |
| 019 | Greenbaum    | USA         | Retrospective then prospective | Percent of presenting problems entered at triage able to be automatically mapped to a structured ontology. | Single-centre (1 site)   | 279 231 patient encounters total (78 157 patient encounters were post-implementation) | Demographics, history of presenting complaint (free-text), pain score, triage score (ESI), vitals                                                                                                          | BoW + SVM                                      | Pre-implementation practice                           | Pre-implementation<br>Structured data capture 26.2%<br>Keystrokes per presenting problem 11.6<br>Post-implementation<br>Structured data capture 97.2%<br>Keystrokes per presenting problem 0.6<br>Higher overall quality (qualitative)                                                                                               |
| 019 | Choi         | South Korea | Retrospective                  | Assignment of triage score (KTAS).                                                                         | Single-centre (1 site)   | 138 022 patient encounters (adults)                                                   | Arrival time, chief complaint (structured), demographics, history of presenting complaint (free-text), mental status, mode of arrival, pain location and intensity, vitals                                 | BoW + LR/RF/XGBoost                            | None                                                  | LR (structured data only) AUC = 0.8812<br>LR (text data only) AUC = 0.8595<br>LR (structured and text) AUC = 0.9053<br>RF (structured and text) AUC = 0.9220<br>XGB (structured and text data) AUC = 0.9220                                                                                                                          |
| 018 | Gligorijevic | USA         | Retrospective                  | Assignment of triage score (ESI).                                                                          | Single-centre (1 site)   | 338 500 patient encounters                                                            | Arrival time, chief complaint (free-text), demographics, history of presenting complaint (free-text), medication, mode of arrival, PMHx, vitals                                                            | “Deep Attention Model (DAM)” based on LSTM+DNN | LR, ANN, LSTM, CNN, Approximated nurses’ performance. | LR (structured data only) AUC 0.5277<br>ANN (structured data only) AUC 0.5689<br>LSTM (structured + text) AUC 0.8523<br>CNN (structured + text) AUC 0.8609<br>DAM (text data only) AUC 0.8763<br>DAM (structured + text) AUC 0.8797<br>Approximated nurses’ performance: Accuracy 43.5%<br>DAM (structured + text) Accuracy of 49.6% |
| 017 | Zhang        | USA         | Retrospective                  | Patient disposition (admission or discharge).                                                              | Multi-centre (642 sites) | 47 200 patient encounters (paediatric and adult)                                      | Arrival time, demographics, chief complaint (free-text), mode of arrival, pain score, PMHx, triage score, vitals, whether the visit was related to an injury/poisoning/adverse effect of medical treatment | BoW + PCA + ANN                                | LR                                                    | LR model 1 (text) AUC 0.742<br>LR model 2 (structured) AUC 0.824<br>LR model 3 (structured and text) AUC 0.846<br>ANN model 1 (text) AUC 0.753<br>ANN model 2 (structured) AUC 0.823<br>ANN model 3 (structured + text) AUC 0.844                                                                                                    |

|     |       |     |               |                                                     |                        |                            |                                                                                                                                |                       |                     |                                                                                                                                    |                                                          |
|-----|-------|-----|---------------|-----------------------------------------------------|------------------------|----------------------------|--------------------------------------------------------------------------------------------------------------------------------|-----------------------|---------------------|------------------------------------------------------------------------------------------------------------------------------------|----------------------------------------------------------|
| 017 | Horng | USA | Retrospective | Diagnosis of infection in the emergency department. | Single-centre (1 site) | 230 936 patient encounters | Demographics, chief complaint (free-text), history of presenting complaint (free-text), pain score, triage score (ESI), vitals | BoW/Topic model + SVM | LR, RF, Naive Bayes | SVM (structured)<br>SVM (structured + text)<br>LR (structured + text)<br>Naïve Bayes (structured + text)<br>RF (structured + text) | AUC 0.67<br>AUC 0.86<br>AUC 0.86<br>AUC 0.83<br>AUC 0.87 |
|-----|-------|-----|---------------|-----------------------------------------------------|------------------------|----------------------------|--------------------------------------------------------------------------------------------------------------------------------|-----------------------|---------------------|------------------------------------------------------------------------------------------------------------------------------------|----------------------------------------------------------|

**Table 1 – Summary of included studies.**

Abbreviations

KTAS - Korean Triage and Acuity Scale

ESI - Emergency Severity Index

ICU - Intensive Care Unit

ED - Emergency Department

ML - Machine learning

FHx - Family history

SHx - Social history

PMHx - Past medical history

Vitals - Respiratory rate (RR), heart rate (HR), systolic blood pressure (SBP), diastolic blood pressure (DBP), temperature (Temp), and oxygen saturation (SPO2).

MTS - Manchester Triage system

BERT - bidirectional encoder representations from transformers

XGBoost - eXtreme Gradient Boosting

LSTM - Long short-term memory

DNN - Deep neural network  
LR - Logistic regression  
RF - Random forest  
CNN - Convolutional neural network  
ANN - Artificial neural network  
BoW - Bag-of-words  
PCA - Principal component analysis  
SVM - Support vector machine  
KNN - k-nearest neighbors  
F1 - the harmonic mean of precision and recall  
AUC - Area under the receiver operating characteristic curve  
ELMo - Embeddings from Language Model  
NEWS - National Early Warning Score

| Study                     | Risk of Bias (ROB) |            |         |          | Applicability |            |         | Overall |               |
|---------------------------|--------------------|------------|---------|----------|---------------|------------|---------|---------|---------------|
|                           | Participants       | Predictors | Outcome | Analysis | Participants  | Predictors | Outcome | ROB     | Applicability |
| Kim et al. 2021           | ?                  | ?          | +       | -        | -             | -          | +       | -       | -             |
| Ivanov et al. 2021        | +                  | +          | -       | -        | +             | +          | +       | -       | +             |
| Tahayori et al. 2020      | +                  | +          | +       | +        | +             | +          | +       | +       | +             |
| Sterling et al. 2020      | ?                  | +          | ?       | -        | +             | +          | ?       | -       | +             |
| Roquette et al. 2020      | +                  | +          | +       | +        | +             | +          | +       | +       | +             |
| Joseph et al. 2020        | +                  | +          | +       | -        | +             | +          | +       | -       | +             |
| Fernandes et al. 2020 (2) | -                  | +          | ?       | +        | +             | +          | +       | -       | +             |
| Fernandes et al. 2020 (1) | -                  | +          | ?       | +        | +             | +          | +       | -       | +             |
| Chang et al. 2020         | +                  | +          | -       | +        | +             | +          | +       | -       | +             |
| Arnaud et al. 2020        | -                  | +          | +       | -        | +             | +          | +       | -       | +             |
| Zhang et al. 2019 (2)     | ?                  | +          | +       | -        | +             | +          | +       | -       | +             |
| Zhang et al. 2019 (1)     | ?                  | +          | +       | -        | +             | +          | +       | -       | +             |
| Wang et al. 2019          | +                  | +          | +       | -        | +             | +          | +       | -       | +             |
| Sterling et al. 2019      | +                  | +          | +       | -        | +             | +          | +       | -       | +             |
| Greenbaum et al. 2019     | +                  | +          | +       | +        | +             | +          | +       | +       | +             |
| Choi et al. 2018          | +                  | +          | ?       | -        | +             | +          | +       | -       | +             |
| Gligorijevic 2018         | +                  | +          | -       | ?        | +             | +          | +       | -       | +             |
| Zhang et al. 2017         | +                  | +          | +       | +        | +             | +          | +       | +       | +             |
| Hornig et al. 2017        | +                  | +          | -       | +        | +             | +          | +       | -       | +             |

**Table 2. PROBAST assessment of the included studies.**

PROBAST = Prediction model Risk Of Bias ASsessment Tool; ROB = risk of bias.

+ indicates low ROB/low concern regarding applicability;

- indicates high ROB/high concern regarding applicability; and

? indicates unclear ROB/unclear concern regarding applicability

| <b>Study</b>              | <b>Dataset available</b> | <b>Code available</b> |
|---------------------------|--------------------------|-----------------------|
| Kim et al. 2021           | No                       | No                    |
| Ivanov et al. 2021        | No                       | No                    |
| Tahayori et al. 2020      | Yes*                     | No                    |
| Sterling et al. 2020      | No                       | No                    |
| Roquette et al. 2020      | No                       | No                    |
| Joseph et al. 2020        | No**                     | Yes                   |
| Fernandes et al. 2020 (2) | Yes*                     | No                    |
| Fernandes et al. 2020 (1) | Yes*                     | No                    |
| Chang et al. 2020         | No                       | Yes                   |
| Arnaud et al. 2020        | No                       | No                    |
| Zhang et al. 2019 (2)     | Yes ***                  | No                    |
| Zhang et al. 2019 (1)     | Yes ***                  | No                    |
| Wang et al. 2019          | No                       | No                    |
| Sterling et al. 2019      | No                       | No                    |
| Greenbaum et al. 2019     | No                       | No                    |
| Choi et al. 2018          | No                       | No                    |
| Gligorijevic 2018         | No                       | No                    |
| Zhang et al. 2017         | Yes***                   | No                    |
| Hornig et al. 2017        | Yes*                     | No                    |

**Table 3. Availability of dataset and code for included studies.**

\* Data available on request from the authors and may be released to researchers following the signing of a data sharing agreement.

\*\* Pending approval, a modified, de-identified dataset containing modified chief complaint text data will be uploaded. Approval still pending at time of this review.

\*\*\* All data freely and publicly available.

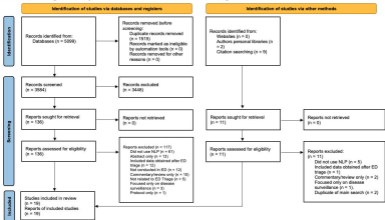

Source: https://medrxiv.org/content/10.1101/2022.12.20.22283735v1.full.pdf
